# Supplementary material for: Novel Machine Learning Approach to Predict and Personalize Length of Stay for Patients Admitted with Syncope from the Emergency Department
Source: MDPI journal article supplement (doi:10.3390/jpm13010007), 2022-12-20
Supplement: s1 [file s1]

**Table S1: Disposition of the Patient Population.**

|                                          | Total           |         | 2016            |         | 2017            |         | 2018            |         | 2019            |         | p-Value |
|------------------------------------------|-----------------|---------|-----------------|---------|-----------------|---------|-----------------|---------|-----------------|---------|---------|
|                                          | (n = 4,645,483) |         | (n = 1,145,359) |         | (n = 1,174,452) |         | (n = 1,137,276) |         | (n = 1,188,396) |         |         |
| Disposition of patient (uniform) from ED |                 |         |                 |         |                 |         |                 |         |                 |         |         |
| Routine                                  | 3,881,001       | (83.5%) | 952,763         | (83.2%) | 973,924         | (82.9%) | 951,524         | (83.7%) | 1,002,790       | (84.4%) | 0.0246  |
| Transfer to short-term hospital          | 95,784          | (2.1%)  | 25,467          | (2.2%)  | 23,552          | (2.0%)  | 22,297          | (2.0%)  | 24,468          | (2.1%)  |         |
| Skilled Nursing Facility (SNF)           | 81,749          | (1.8%)  | 19,368          | (1.7%)  | 20,959          | (1.8%)  | 20,017          | (1.8%)  | 21,406          | (1.8%)  |         |
| Home Health Care (HHC)                   | 54,042          | (1.2%)  | 11,299          | (1.0%)  | 14,061          | (1.2%)  | 13,768          | (1.2%)  | 14,914          | (1.3%)  |         |
| Against medical advice (AMA)             | 156,651         | (3.4%)  | 37,105          | (3.2%)  | 41,714          | (3.6%)  | 37,099          | (3.3%)  | 40,733          | (3.4%)  |         |
| Admitted inpatient to this hospital      | 374,947         | (8.1%)  | 98,894          | (8.6%)  | 99,912          | (8.5%)  | 92,344          | (8.1%)  | 83,798          | (7.1%)  |         |
| Died in ED                               | 1,309           | (0.0%)  | 464             | (0.0%)  | 330             | (0.0%)  | 227             | (0.0%)  | 288             | (0.0%)  |         |
| Disposition of patient (uniform) from IP |                 |         |                 |         |                 |         |                 |         |                 |         |         |
| Routine                                  | 245,120         | (65.4%) | 65,759          | (66.5%) | 65,099          | (65.2%) | 60,044          | (65.0%) | 54,219          | (64.7%) | 0.0253  |
| Transfer to short-term hospital          | 5,560           | (1.5%)  | 1,461           | (1.5%)  | 1,458           | (1.5%)  | 1,423           | (1.5%)  | 1,218           | (1.5%)  |         |
| Skilled Nursing Facility (SNF)           | 56,198          | (15.0%) | 15,302          | (15.5%) | 14,941          | (15.0%) | 13,488          | (14.6%) | 12,467          | (14.9%) |         |
| Home Health Care (HHC)                   | 54,554          | (14.5%) | 12,857          | (13.0%) | 14,968          | (15.0%) | 13,883          | (15.0%) | 12,846          | (15.3%) |         |
| Against medical advice (AMA)             | 12,586          | (3.4%)  | 3,227           | (3.3%)  | 3,211           | (3.2%)  | 3,304           | (3.6%)  | 2,844           | (3.4%)  |         |
| Died in ED                               | 929             | (0.2%)  | 287             | (0.3%)  | 235             | (0.2%)  | 203             | (0.2%)  | 204             | (0.2%)  |         |

**Table S2: Hospital Demographics.**

|                                   | Total           |         | 2016            |         | 2017            |         | 2018            |         | 2019            |         | <i>p</i> -Value |
|-----------------------------------|-----------------|---------|-----------------|---------|-----------------|---------|-----------------|---------|-----------------|---------|-----------------|
|                                   | (n = 4,645,483) |         | (n = 1,145,359) |         | (n = 1,174,452) |         | (n = 1,137,276) |         | (n = 1,188,396) |         |                 |
| Control/ownership of the hospital |                 |         |                 |         |                 |         |                 |         |                 |         |                 |
| Government or private             | 2,017,771       | (43.4%) | 819,639         | (71.6%) | 862,422         | (73.4%) | 159,803         | (14.1%) | 175,906         | (14.8%) | < 0.001         |
| Government, nonfederal            | 377,271         | (8.1%)  | 52,146          | (4.6%)  | 53,784          | (4.6%)  | 135,361         | (11.9%) | 135,979         | (11.4%) |                 |
| Private, not-for-profit           | 1,430,591       | (30.8%) | 149,819         | (13.1%) | 140,108         | (11.9%) | 503,342         | (44.3%) | 637,322         | (53.6%) |                 |
| Private, investor-owned           | 360,767         | (7.8%)  | 64,161          | (5.6%)  | 63,181          | (5.4%)  | 118,161         | (10.4%) | 115,263         | (9.7%)  |                 |
| Private                           | 459,084         | (9.9%)  | 59,593          | (5.2%)  | 54,957          | (4.7%)  | 220,609         | (19.4%) | 123,925         | (10.4%) |                 |
| Region of hospital                |                 |         |                 |         |                 |         |                 |         |                 |         |                 |
| Northeast                         | 935,245         | (20.1%) | 225,265         | (19.7%) | 237,677         | (20.2%) | 233,475         | (20.5%) | 238,827         | (20.1%) | 1               |
| Midwest                           | 1,034,363       | (22.3%) | 259,122         | (22.6%) | 258,084         | (22.0%) | 249,113         | (21.9%) | 268,044         | (22.6%) |                 |
| South                             | 1,752,100       | (37.7%) | 429,525         | (37.5%) | 450,707         | (38.4%) | 425,176         | (37.4%) | 446,693         | (37.6%) |                 |
| West                              | 923,775         | (19.9%) | 231,447         | (20.2%) | 227,985         | (19.4%) | 229,512         | (20.2%) | 234,832         | (19.8%) |                 |
| Teaching status of the hospital   |                 |         |                 |         |                 |         |                 |         |                 |         |                 |
| Metropolitan non-teaching         | 1,140,700       | (24.6%) | 335,392         | (29.3%) | 302,280         | (25.7%) | 260,522         | (22.9%) | 242,505         | (20.4%) | < 0.001         |
| Metropolitan teaching             | 2,835,167       | (61.0%) | 642,257         | (56.1%) | 707,586         | (60.2%) | 708,181         | (62.3%) | 777,143         | (65.4%) |                 |
| Non-metropolitan hospital         | 669,616         | (14.4%) | 167,710         | (14.6%) | 164,587         | (14.0%) | 168,572         | (14.8%) | 168,747         | (14.2%) |                 |
| Hospital urban-rural designation  |                 |         |                 |         |                 |         |                 |         |                 |         |                 |
| Large metropolitan                | 2,434,656       | (52.4%) | 594,776         | (51.9%) | 614,437         | (52.3%) | 599,271         | (52.7%) | 626,171         | (52.7%) | < 0.001         |
| Small metropolitan                | 1,468,398       | (31.6%) | 364,988         | (31.9%) | 378,345         | (32.2%) | 353,976         | (31.1%) | 371,089         | (31.2%) |                 |
| Micropolitan areas                | 379,372         | (8.2%)  | 91,020          | (7.9%)  | 88,808          | (7.6%)  | 94,662          | (8.3%)  | 104,881         | (8.8%)  |                 |
| Not metropolitan or micropolitan  | 207,053         | (4.5%)  | 52,333          | (4.6%)  | 51,996          | (4.4%)  | 51,852          | (4.6%)  | 50,872          | (4.3%)  |                 |

**Table S3: Elixhauser Comorbidity Indices of the Patient Population.**

|                                        | Total           |         | 2016            |         | 2017            |         | 2018            |         | 2019            |         | p-Value |
|----------------------------------------|-----------------|---------|-----------------|---------|-----------------|---------|-----------------|---------|-----------------|---------|---------|
|                                        | (n = 4,645,483) |         | (n = 1,145,359) |         | (n = 1,174,452) |         | (n = 1,137,276) |         | (n = 1,188,396) |         |         |
| Hypertension, Uncomplicated            | 1,522,125       | (32.8%) | 396,318         | (34.6%) | 388,954         | (33.1%) | 362,781         | (31.9%) | 374,071         | (31.5%) | < 0.001 |
| Cardiac Arrhythmias                    | 720,176         | (15.5%) | 166,000         | (14.5%) | 180,669         | (15.4%) | 179,898         | (15.8%) | 193,608         | (16.3%) | < 0.001 |
| Fluid and Electrolyte Disorders        | 672,863         | (14.5%) | 160,183         | (14.0%) | 167,846         | (14.3%) | 171,049         | (15.0%) | 173,785         | (14.6%) | 0.0228  |
| Diabetes, Uncomplicated                | 484,394         | (10.4%) | 130,952         | (11.4%) | 123,531         | (10.5%) | 112,420         | (9.9%)  | 117,489         | (9.9%)  | < 0.001 |
| Chronic Pulmonary Disease              | 444,555         | (9.6%)  | 105,206         | (9.2%)  | 112,837         | (9.6%)  | 112,663         | (9.9%)  | 113,849         | (9.6%)  | 0.0801  |
| Hypertension, Complicated              | 373,160         | (8.0%)  | 63,601          | (5.6%)  | 94,545          | (8.1%)  | 101,050         | (8.9%)  | 113,964         | (9.6%)  | < 0.001 |
| Hypothyroidism                         | 320,596         | (6.9%)  | 76,431          | (6.7%)  | 82,281          | (7.0%)  | 80,053          | (7.0%)  | 81,831          | (6.9%)  | 0.2352  |
| Renal Failure                          | 299,530         | (6.4%)  | 66,991          | (5.8%)  | 74,820          | (6.4%)  | 74,973          | (6.6%)  | 82,746          | (7.0%)  | < 0.001 |
| Depression                             | 268,992         | (5.8%)  | 60,975          | (5.3%)  | 69,875          | (5.9%)  | 68,603          | (6.0%)  | 69,539          | (5.9%)  | 0.0106  |
| Congestive Heart Failure               | 264,362         | (5.7%)  | 58,661          | (5.1%)  | 66,339          | (5.6%)  | 67,155          | (5.9%)  | 72,207          | (6.1%)  | < 0.001 |
| Diabetes, Complicated                  | 248,525         | (5.3%)  | 44,187          | (3.9%)  | 63,610          | (5.4%)  | 66,211          | (5.8%)  | 74,518          | (6.3%)  | < 0.001 |
| Other Neurological Disorders           | 231,279         | (5.0%)  | 55,258          | (4.8%)  | 58,384          | (5.0%)  | 56,663          | (5.0%)  | 60,974          | (5.1%)  | 0.1529  |
| Obesity                                | 184,258         | (4.0%)  | 37,956          | (3.3%)  | 44,553          | (3.8%)  | 49,279          | (4.3%)  | 52,471          | (4.4%)  | < 0.001 |
| Valvular Disease                       | 165,882         | (3.6%)  | 38,815          | (3.4%)  | 41,473          | (3.5%)  | 42,332          | (3.7%)  | 43,263          | (3.6%)  | 0.3366  |
| Peripheral Vascular Disorders          | 146,736         | (3.2%)  | 36,553          | (3.2%)  | 36,316          | (3.1%)  | 36,236          | (3.2%)  | 37,630          | (3.2%)  | 0.9179  |
| Drug Abuse                             | 131,533         | (2.8%)  | 29,553          | (2.6%)  | 32,686          | (2.8%)  | 34,756          | (3.1%)  | 34,538          | (2.9%)  | 0.0006  |
| Alcohol Abuse                          | 113,412         | (2.4%)  | 29,852          | (2.6%)  | 27,780          | (2.4%)  | 28,033          | (2.5%)  | 27,748          | (2.3%)  | 0.003   |
| Rheumatoid Arthritis/Collagen Vascular | 60,798          | (1.3%)  | 13,813          | (1.2%)  | 15,762          | (1.3%)  | 15,242          | (1.3%)  | 15,981          | (1.3%)  | 0.0162  |
| Solid Tumor Without Metastasis         | 57,704          | (1.2%)  | 13,869          | (1.2%)  | 14,246          | (1.2%)  | 14,016          | (1.2%)  | 15,573          | (1.3%)  | 0.1828  |
| Deficiency Anemia                      | 49,834          | (1.1%)  | 11,295          | (1.0%)  | 12,392          | (1.1%)  | 12,819          | (1.1%)  | 13,329          | (1.1%)  | 0.0115  |
| Coagulopathy                           | 48,972          | (1.1%)  | 12,052          | (1.1%)  | 12,982          | (1.1%)  | 11,967          | (1.1%)  | 11,971          | (1.0%)  | 0.196   |
| Pulmonary Circulation Disorders        | 41,608          | (0.9%)  | 9,536           | (0.8%)  | 10,385          | (0.9%)  | 10,909          | (1.0%)  | 10,778          | (0.9%)  | 0.0567  |
| Liver Disease                          | 41,212          | (0.9%)  | 9,116           | (0.8%)  | 10,311          | (0.9%)  | 10,531          | (0.9%)  | 11,254          | (0.9%)  | 0.0049  |
| Psychoses                              | 33,974          | (0.7%)  | 7,463           | (0.7%)  | 8,395           | (0.7%)  | 8,792           | (0.8%)  | 9,324           | (0.8%)  | 0.016   |

Lee S. et al, Novel Machine Learning Approach to Predict and Personalize Length of Stay for Patients Admitted with Syncope from the Emergency Department

|                                         |        |        |       |        |       |        |       |        |       |        |        |
|-----------------------------------------|--------|--------|-------|--------|-------|--------|-------|--------|-------|--------|--------|
| Weight Loss                             | 29,585 | (0.6%) | 6,477 | (0.6%) | 7,555 | (0.6%) | 7,679 | (0.7%) | 7,874 | (0.7%) | 0.0094 |
| Metastatic Cancer                       | 18,150 | (0.4%) | 4,156 | (0.4%) | 4,235 | (0.4%) | 4,781 | (0.4%) | 4,979 | (0.4%) | 0.0155 |
| Lymphoma                                | 12,141 | (0.3%) | 2,930 | (0.3%) | 2,968 | (0.3%) | 2,808 | (0.2%) | 3,435 | (0.3%) | 0.0632 |
| Paralysis                               | 6,925  | (0.1%) | 1,627 | (0.1%) | 1,797 | (0.2%) | 1,665 | (0.1%) | 1,836 | (0.2%) | 0.6787 |
| Peptic Ulcer Disease Excluding Bleeding | 6,863  | (0.1%) | 1,961 | (0.2%) | 1,819 | (0.2%) | 1,537 | (0.1%) | 1,546 | (0.1%) | 0.0046 |
| AIDS/HIV                                | 6,586  | (0.1%) | 1,387 | (0.1%) | 1,771 | (0.2%) | 1,528 | (0.1%) | 1,900 | (0.2%) | 0.2316 |
| Blood Loss Anemia                       | 5,649  | (0.1%) | 1,242 | (0.1%) | 1,543 | (0.1%) | 1,404 | (0.1%) | 1,460 | (0.1%) | 0.205  |

**Table S4: The Sum of Elixhauser Comorbidity Index score of the Patient Population Stratified by the Calendar Year.**

|    | <b>Total</b>           |         | <b>2016</b>            |         | <b>2017</b>            |         | <b>2018</b>            |         | <b>2019</b>            |         |
|----|------------------------|---------|------------------------|---------|------------------------|---------|------------------------|---------|------------------------|---------|
|    | <b>(n = 4,645,483)</b> |         | <b>(n = 1,145,359)</b> |         | <b>(n = 1,174,452)</b> |         | <b>(n = 1,137,276)</b> |         | <b>(n = 1,188,396)</b> |         |
| 0  | 1,670,288              | (36.0%) | 426,332                | (37.2%) | 421,696                | (35.9%) | 403,301                | (35.5%) | 418,959                | (35.3%) |
| 1  | 1,133,290              | (24.4%) | 281,388                | (24.6%) | 285,393                | (24.3%) | 277,458                | (24.4%) | 289,052                | (24.3%) |
| 2  | 772,046                | (16.6%) | 189,505                | (16.5%) | 196,974                | (16.8%) | 187,604                | (16.5%) | 197,962                | (16.7%) |
| 3  | 484,450                | (10.4%) | 116,117                | (10.1%) | 122,405                | (10.4%) | 119,534                | (10.5%) | 126,395                | (10.6%) |
| 4  | 286,699                | (6.2%)  | 66,122                 | (5.8%)  | 73,210                 | (6.2%)  | 72,124                 | (6.3%)  | 75,242                 | (6.3%)  |
| 5  | 156,813                | (3.4%)  | 35,238                 | (3.1%)  | 39,583                 | (3.4%)  | 39,911                 | (3.5%)  | 42,081                 | (3.5%)  |
| 6  | 80,047                 | (1.7%)  | 17,418                 | (1.5%)  | 20,008                 | (1.7%)  | 20,990                 | (1.8%)  | 21,631                 | (1.8%)  |
| 7  | 37,003                 | (0.8%)  | 8,059                  | (0.7%)  | 9,217                  | (0.8%)  | 9,643                  | (0.8%)  | 10,084                 | (0.8%)  |
| 8  | 15,777                 | (0.3%)  | 3,299                  | (0.3%)  | 3,680                  | (0.3%)  | 4,366                  | (0.4%)  | 4,432                  | (0.4%)  |
| 9  | 6,361                  | (0.1%)  | 1,357                  | (0.1%)  | 1,682                  | (0.1%)  | 1,619                  | (0.1%)  | 1,703                  | (0.1%)  |
| 10 | 1,964                  | (0.0%)  | 377                    | (0.0%)  | 467                    | (0.0%)  | 468                    | (0.0%)  | 652                    | (0.1%)  |
| 11 | 611                    | (0.0%)  | 102                    | (0.0%)  | 122                    | (0.0%)  | 210                    | (0.0%)  | 177                    | (0.0%)  |
| 12 | 92                     | (0.0%)  | 27                     | (0.0%)  | 7                      | (0.0%)  | 32                     | (0.0%)  | 27                     | (0.0%)  |
| 13 | 38                     | (0.0%)  | 14                     | (0.0%)  | 9                      | (0.0%)  | 16                     | (0.0%)  | 0                      | (0.0%)  |
| 14 | 4                      | (0.0%)  | 4                      | (0.0%)  | 0                      | (0.0%)  | 0                      | (0.0%)  | 0                      | (0.0%)  |

The p-value for significance is 0.5889. The Sum Elixhauser Comorbidity Index is presented here as a continuous variable.
